# Supplementary material
Source: MDPI journal article supplement (https://www.mdpi.com/2227-9717/11/4/1066)
Supplement: s1 [file s1]

**Table S1.** Factor setting of the 30 batches performed in the CCD and their corresponding results in terms of sphericity, median ( $x_{50.3}$ ) and COV ( $x_{50.3}$ ).

| Batch | Spray pressure [bar] | Process air temperature [°C] | Rotor speed [rpm] | Spray rate [g/min] | Sphericity [-] | Median ( $x_{50.3}$ ) [ $\mu\text{m}$ ] | COV ( $x_{50.3}$ ) [-] |
|-------|----------------------|------------------------------|-------------------|--------------------|----------------|-----------------------------------------|------------------------|
| 1     | 1.8                  | 80                           | 650               | 16.5               | 0.7755         | 160.7                                   | 0.437                  |
| 2     | 1.6                  | 85                           | 475               | 14                 | 0.7845         | 144.9                                   | 0.427                  |
| 3     | 1.8                  | 80                           | 650               | 16.5               | 0.7995         | 178.6                                   | 0.461                  |
| 4     | 1.6                  | 75                           | 825               | 19                 | 0.7825         | 257.1                                   | 0.52                   |
| 5     | 1.6                  | 85                           | 475               | 19                 | 0.7875         | 238.4                                   | 0.499                  |
| 6     | 2.0                  | 75                           | 475               | 14                 | 0.7835         | 145.2                                   | 0.44                   |
| 7     | 1.6                  | 85                           | 825               | 19                 | 0.7805         | 263.8                                   | 0.52                   |
| 8     | 2.0                  | 85                           | 825               | 14                 | 0.78           | 113.4                                   | 0.35                   |
| 9     | 1.8                  | 80                           | 1000              | 16.5               | 0.7705         | 134.8                                   | 0.381                  |
| 10    | 2.0                  | 85                           | 475               | 14                 | 0.817          | 152.6                                   | 0.439                  |
| 11    | 2.0                  | 75                           | 825               | 19                 | 0.778          | 160.7                                   | 0.439                  |
| 12    | 1.8                  | 80                           | 650               | 11.5               | 0.817          | 136                                     | 0.41                   |
| 13    | 1.6                  | 75                           | 475               | 14                 | 0.8            | 188.3                                   | 0.465                  |
| 14    | 2.2                  | 80                           | 650               | 16.5               | 0.7775         | 130.1                                   | 0.418                  |
| 15    | 1.8                  | 80                           | 650               | 16.5               | 0.783          | 158.8                                   | 0.444                  |
| 16    | 1.6                  | 75                           | 825               | 14                 | 0.7895         | 153.3                                   | 0.435                  |
| 17    | 1.4                  | 80                           | 650               | 16.5               | 0.7725         | 237.3                                   | 0.501                  |
| 18    | 2.0                  | 85                           | 825               | 19                 | 0.803          | 170.7                                   | 0.452                  |
| 19    | 2.0                  | 75                           | 825               | 14                 | 0.799          | 132.7                                   | 0.408                  |
| 20    | 1.8                  | 80                           | 300               | 16.5               | 0.7715         | 151                                     | 0.438                  |
| 21    | 1.8                  | 90                           | 650               | 16.5               | 0.8155         | 203.9                                   | 0.476                  |
| 22    | 1.8                  | 80                           | 650               | 16.5               | 0.775          | 149.9                                   | 0.436                  |
| 23    | 2.0                  | 75                           | 475               | 19                 | 0.792          | 177.4                                   | 0.456                  |
| 24    | 1.8                  | 80                           | 650               | 21.5               | 0.7695         | 190.2                                   | 0.493                  |
| 25    | 1.8                  | 70                           | 650               | 16.5               | 0.795          | 198.2                                   | 0.472                  |
| 26    | 1.6                  | 75                           | 475               | 19                 | 0.7725         | 218.2                                   | 0.493                  |
| 27    | 2.0                  | 85                           | 475               | 19                 | 0.777          | 155.2                                   | 0.44                   |
| 28    | 1.8                  | 80                           | 650               | 16.5               | 0.7795         | 151.8                                   | 0.442                  |
| 29    | 1.8                  | 80                           | 650               | 16.5               | 0.805          | 160                                     | 0.45                   |
| 30    | 1.6                  | 85                           | 825               | 14                 | 0.8095         | 158.6                                   | 0.415                  |

**Table S2.** SFV parameters in the rotary fluidized bed agglomeration process.

| SFV parameter                             | Setting |
|-------------------------------------------|---------|
| Internal air flow [l/min]                 | 15      |
| External air flow [l/min]                 | 5       |
| Distance of probe to the wall [cm]        | 4       |
| Disperser type [-]                        | D12     |
| Angle of disperser [°]                    | 35–45   |
| Maximum loading measuring site 1 [%]      | 5       |
| Maximum loading measuring site 2 [%]      | 10      |
| Ring memory measuring point 1 [particles] | 15000   |
| Ring memory measuring point 2 [particles] | 2500    |

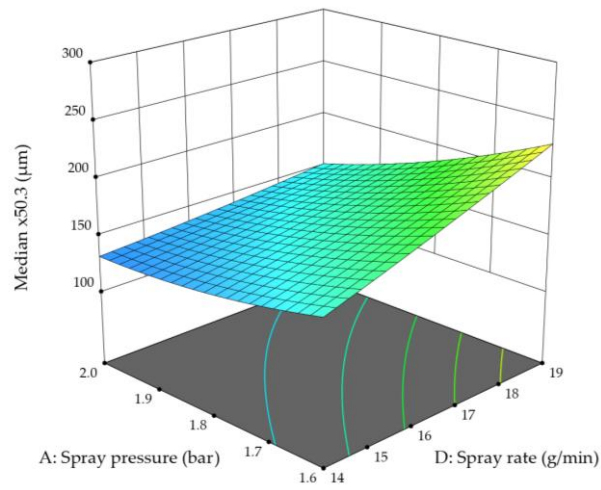

(a)

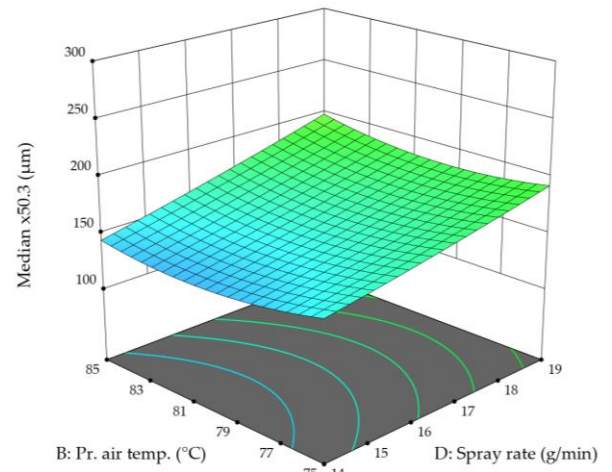

(b)

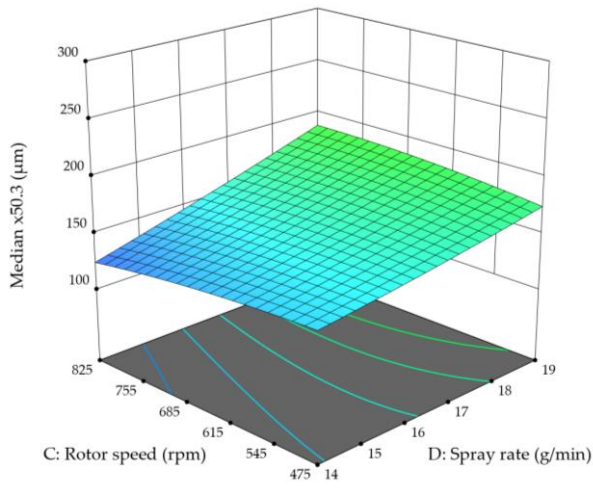

(c)

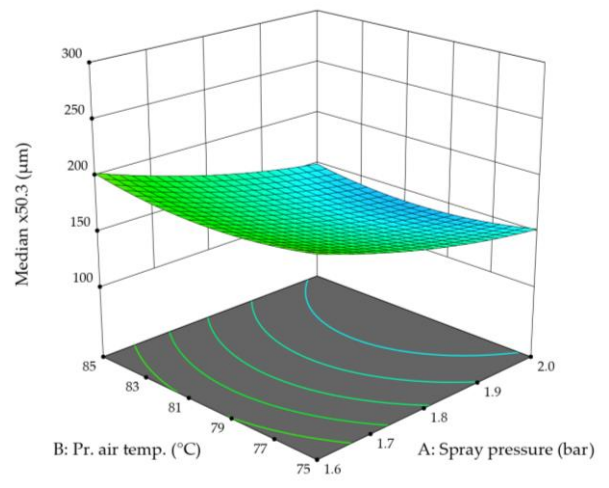

(d)

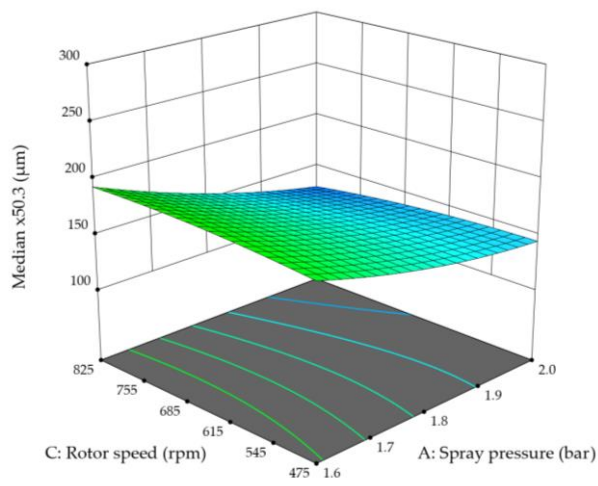

(e)

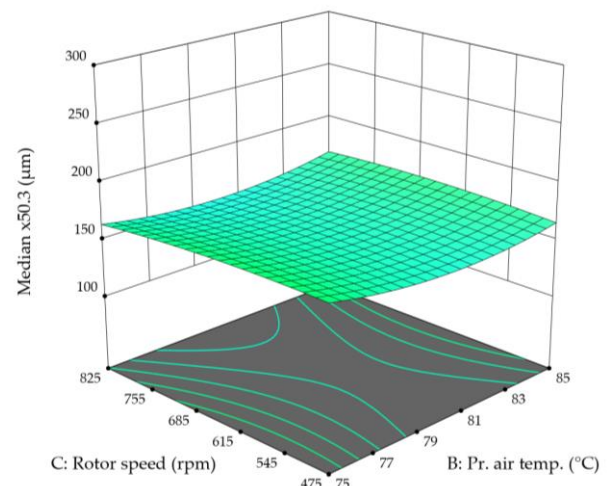

(f)

**Figure S1:** Response surface models for median ( $x_{50.3}$ ) for different factor combinations: (a) spray pressure vs spray rate, (b) process air temperature vs. spray rate, (c) rotor speed vs. spray rate, (d) process air temperature vs. spray pressure, (e) rotor speed vs. spray pressure, (f) rotor speed vs process air temperature. All independent variables that are not included in the graphs are set to the central point.

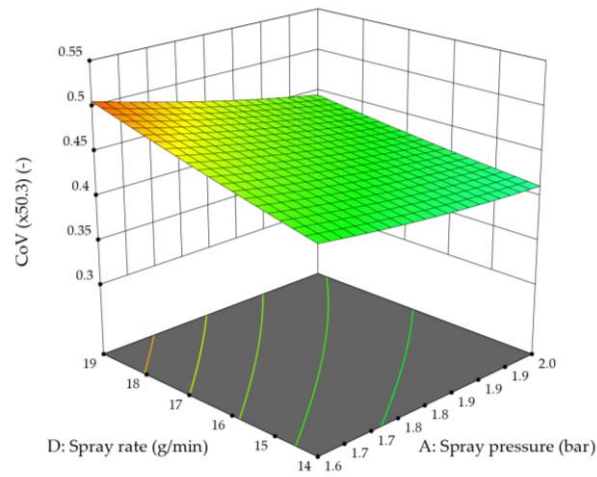

(a)

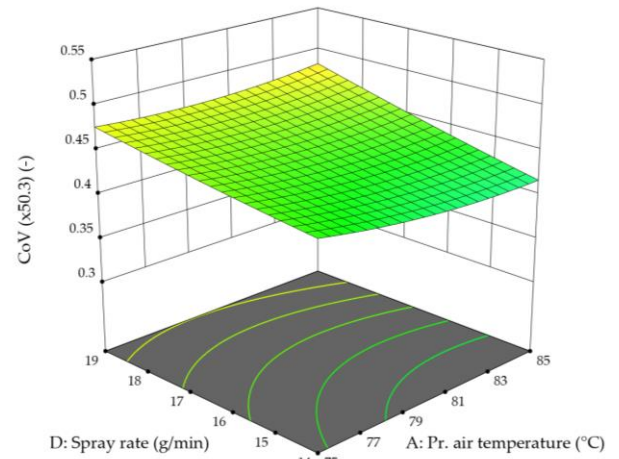

(b)

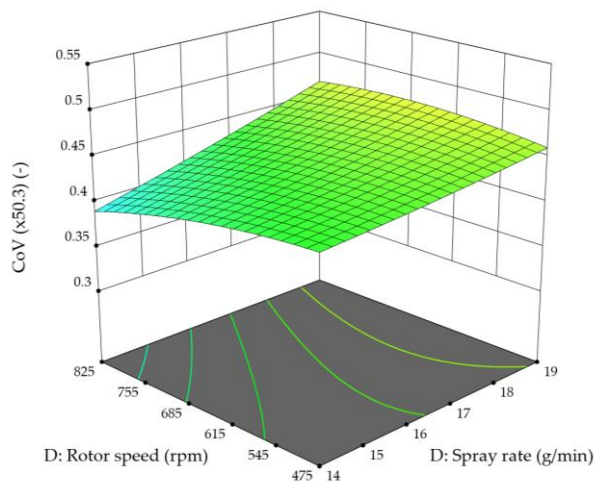

(c)

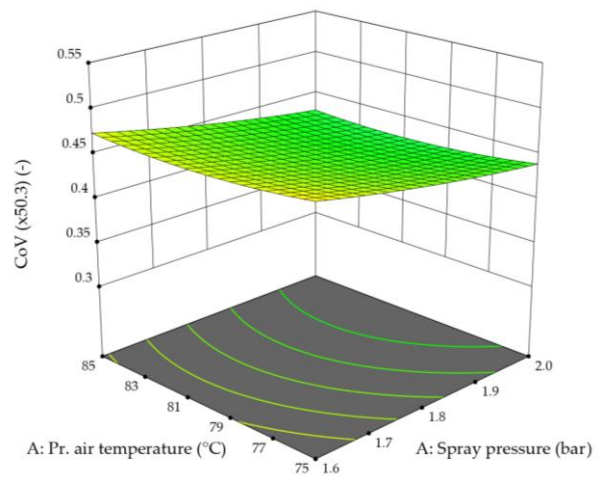

(d)

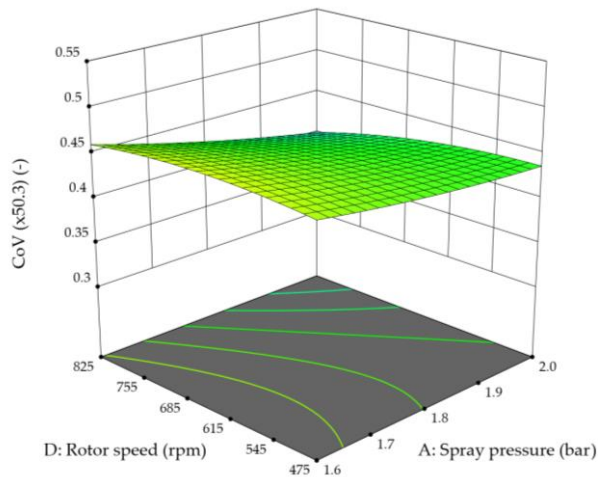

(e)

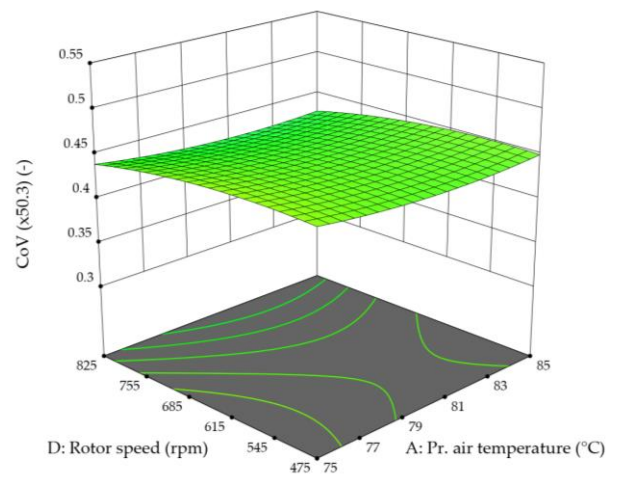

(f)

**Figure S2:** Response surface models for COV ( $\times 50.3$ ) for different factor combinations: (a) spray pressure vs spray rate, (b) process air temperature vs. spray rate, (c) rotor speed vs. spray rate, (d) process air temperature vs. spray pressure, (e) rotor speed vs. spray pressure, (f) rotor speed vs process air temperature. All independent variables that are not included in the graphs are set to the central point.
